# Supplementary material for: The cigarette market in Brazil: new evidence on illicit practices from the 2019 National Health Survey
Source: PubMed Central journal article supplement — Tob Control. 2023 Jun 15;33(Suppl 2):s128–34. doi: 10.1136/tc-2022-057847 (PMC11187383; doi:10.1136/tc-2022-057847), 2023-06-15

### Supplemental Figures 1a-1p. Distribution of prices per pack paid by smokers, by “brand-illicit status”. Brazil, selected regions, 2019

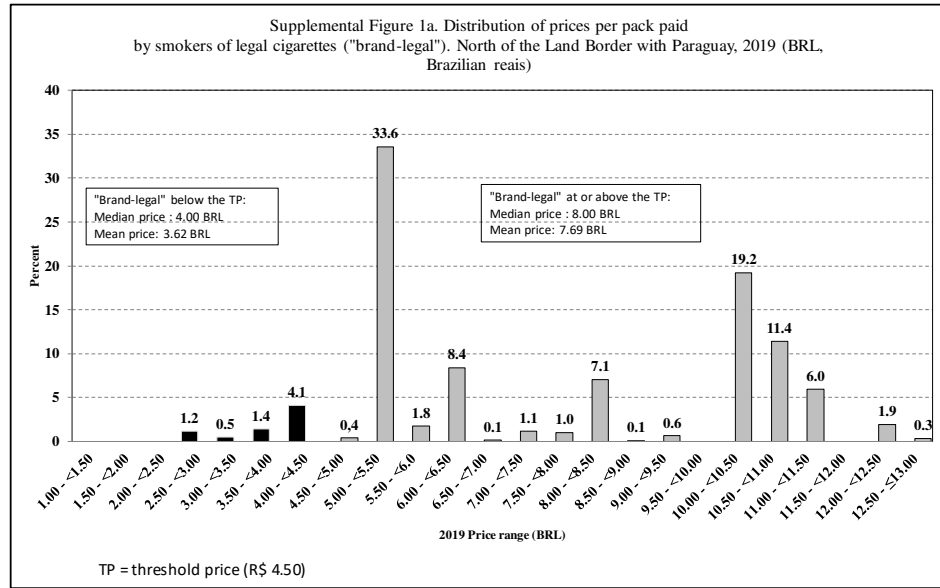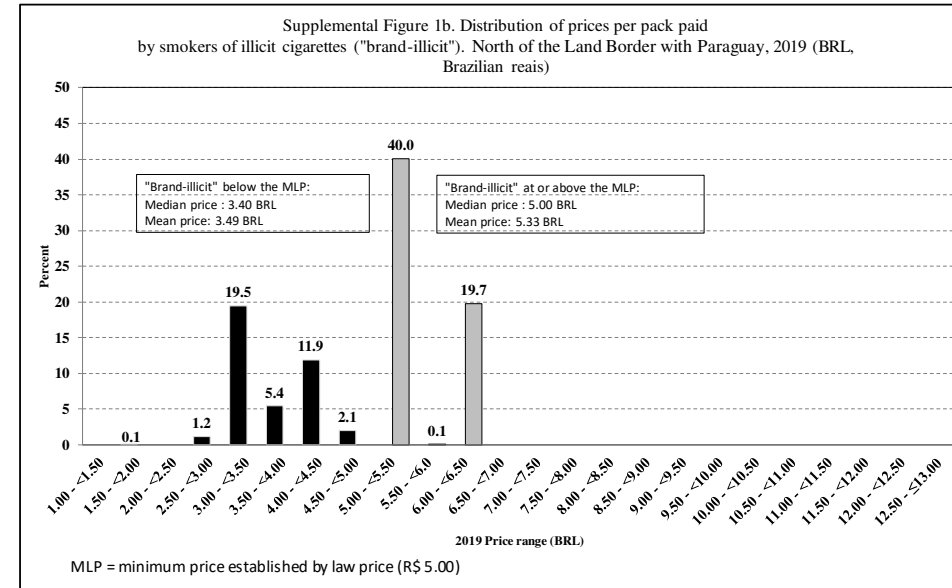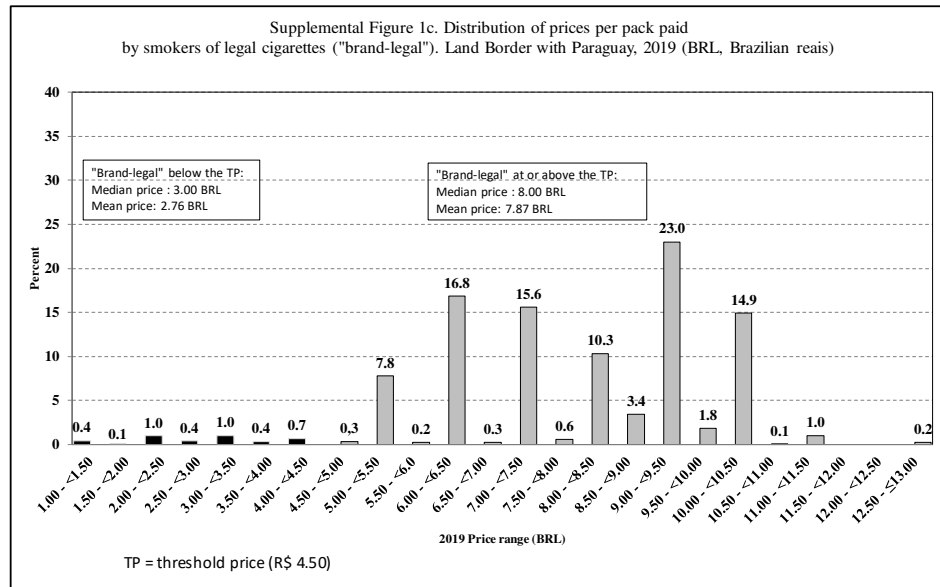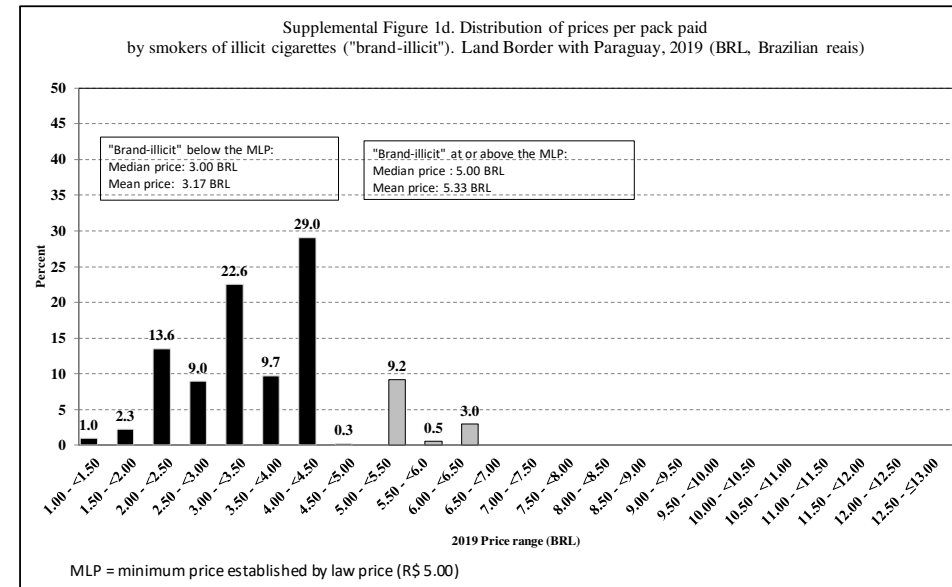

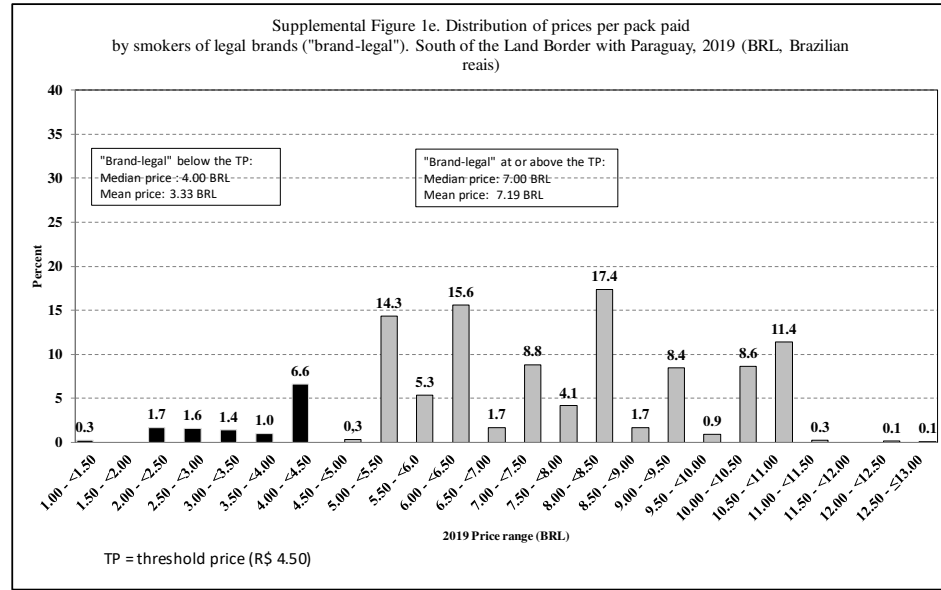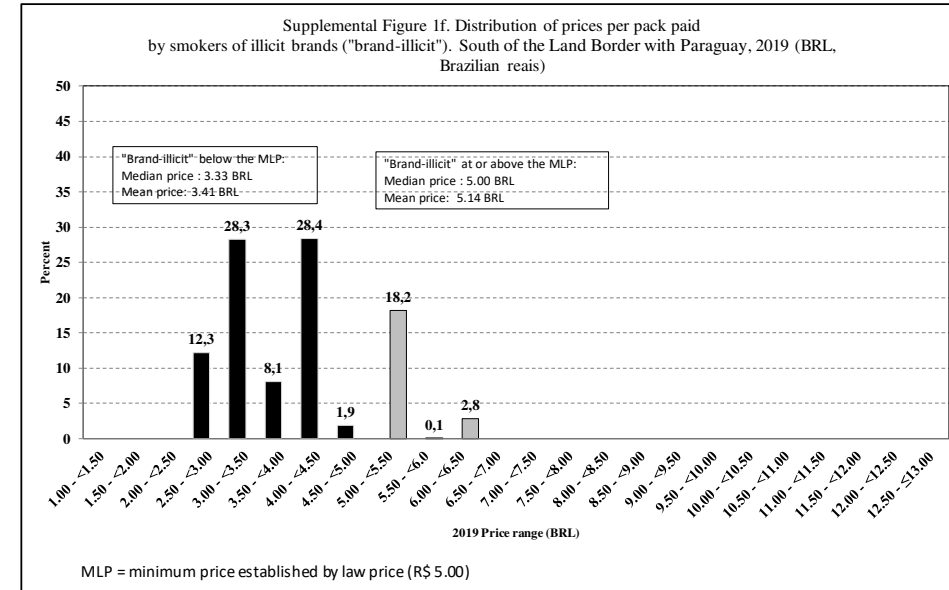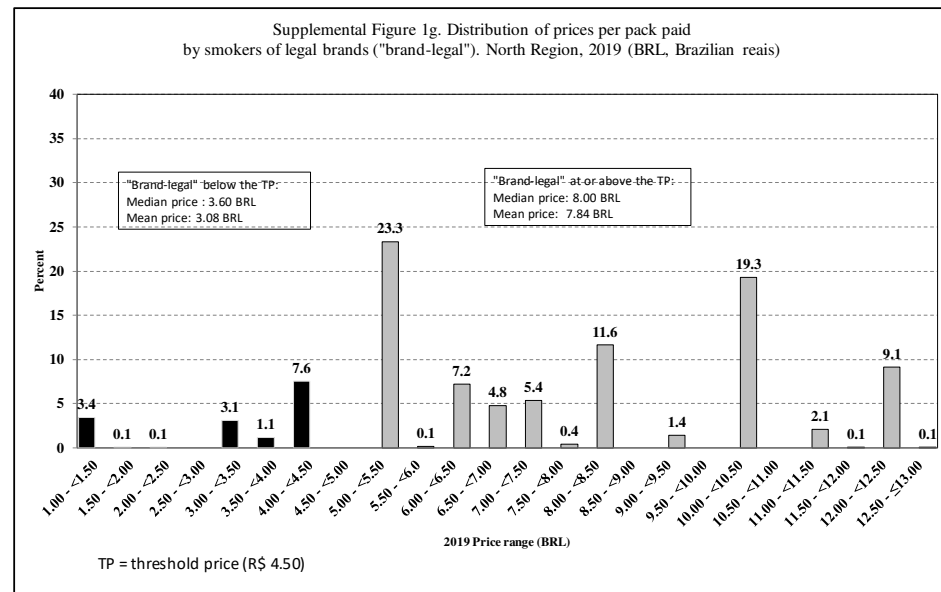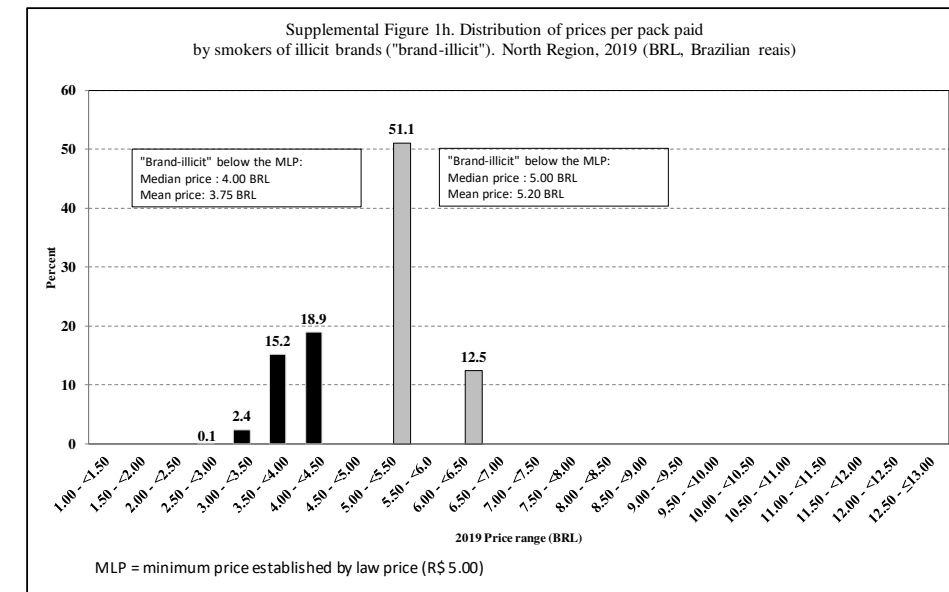

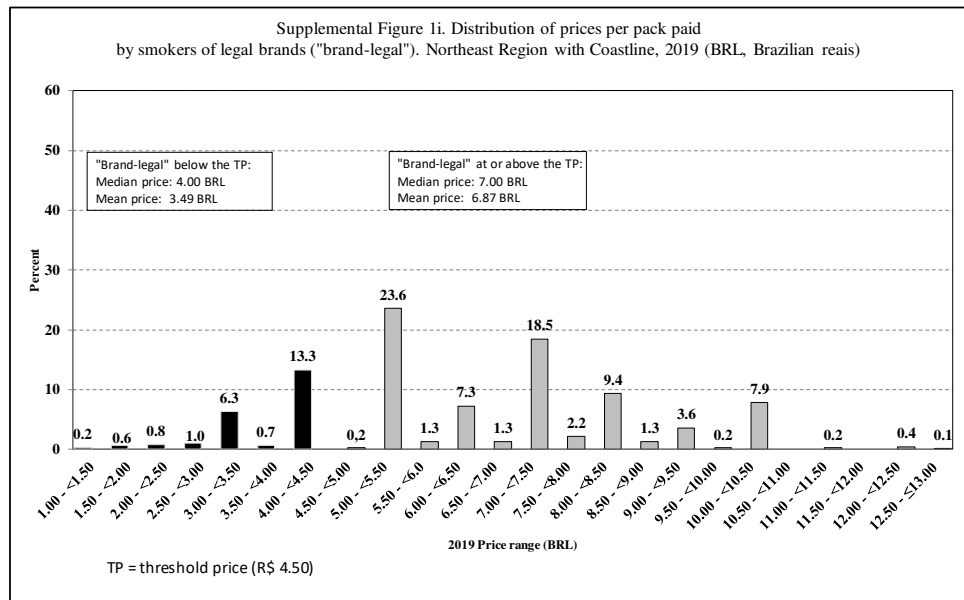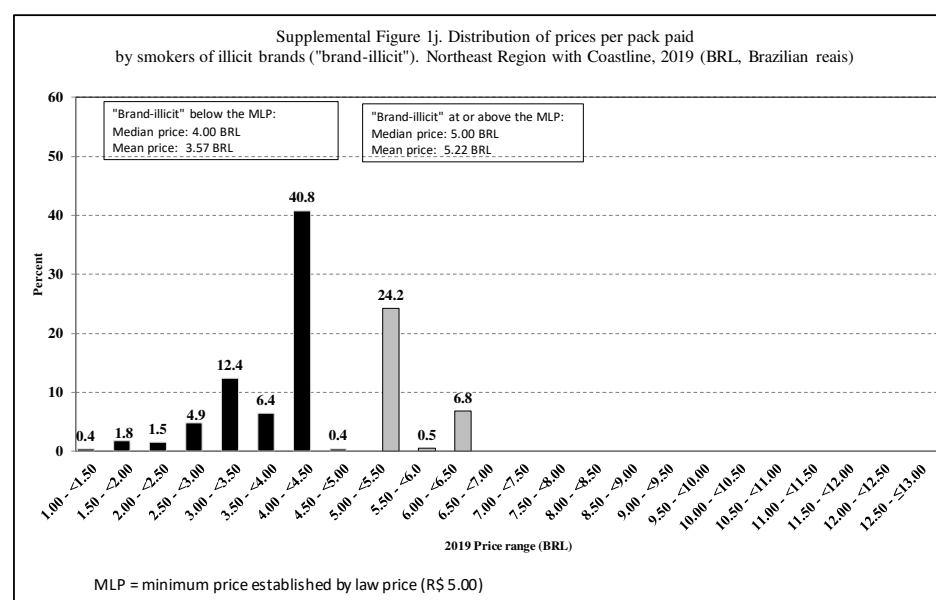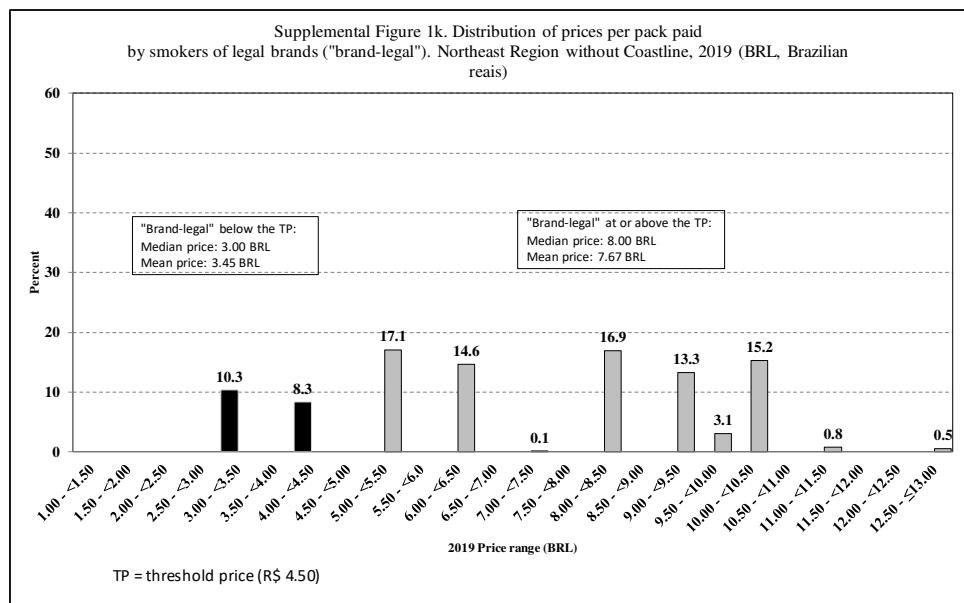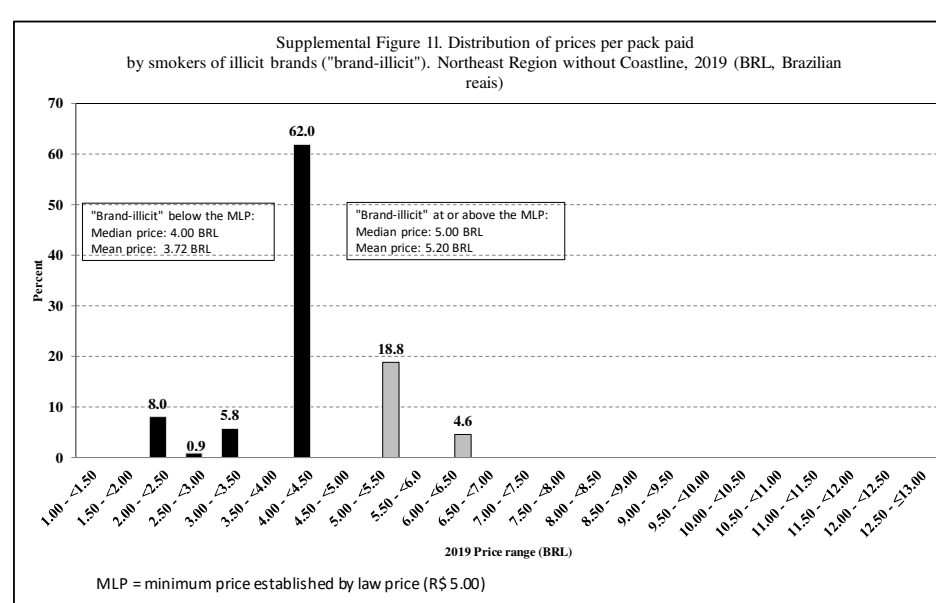

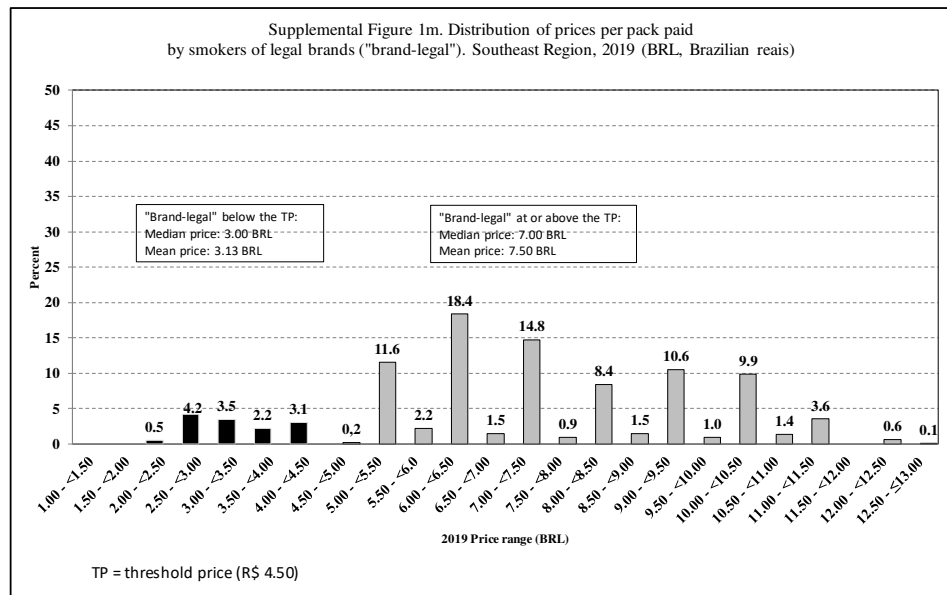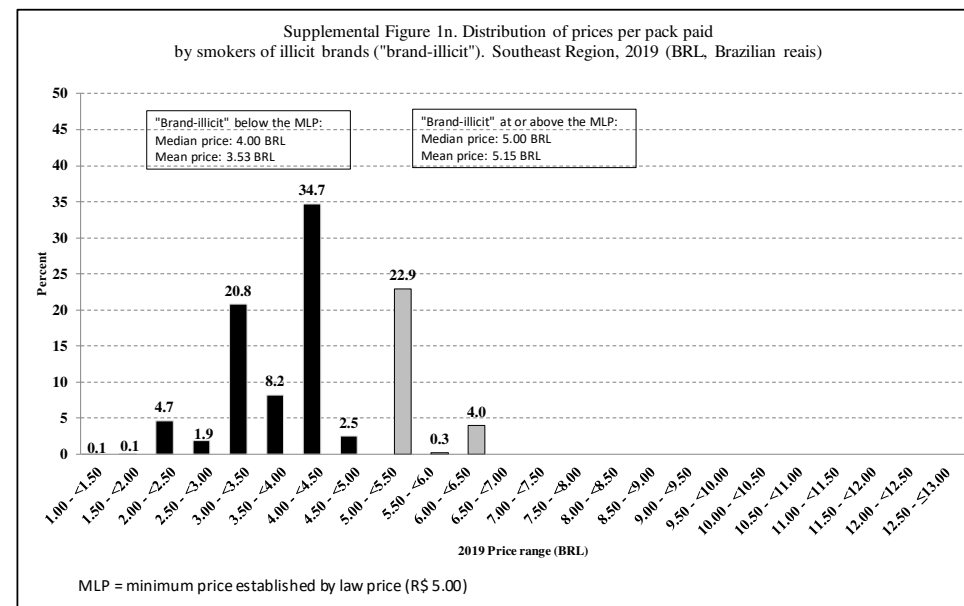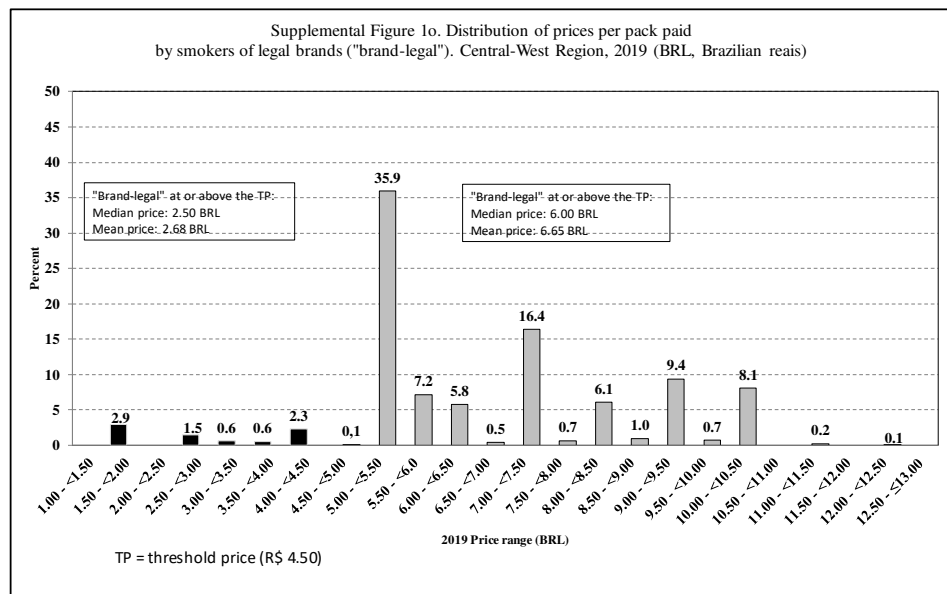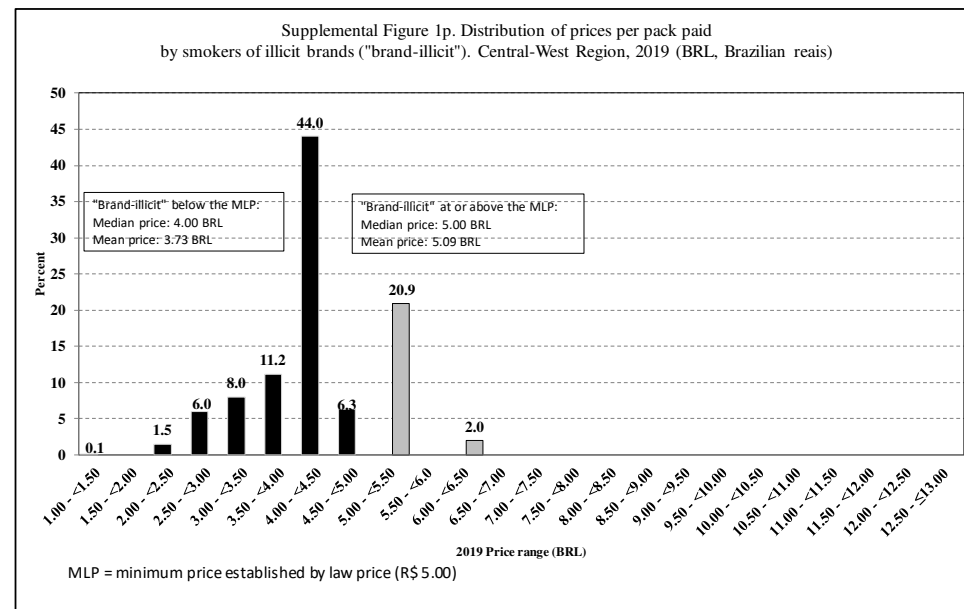

Supplement: tc-2022-057847supp003.pdf [file tc-2022-057847supp003.pdf]
