# Supplementary material for: The cigarette market in Brazil: new evidence on illicit practices from the 2019 National Health Survey
Source: PubMed Central journal article supplement — Tob Control. 2023 Jun 15;33(Suppl 2):s128–34. doi: 10.1136/tc-2022-057847 (PMC11187383; doi:10.1136/tc-2022-057847), 2023-06-15
Supplement: tc-2022-057847supp001.pdf [file tc-2022-057847supp001.pdf]

**Supplemental Table 1. Proportion of illicit cigarette consumption, by Brazilian state and source of information, 2019**

| Region       | State               | % Overall illicit <sup>1,2</sup> |                       |                         |
|--------------|---------------------|----------------------------------|-----------------------|-------------------------|
|              |                     | Official data                    | Tobacco Industry      | Absolute difference (%) |
| Brazil       | All                 | 47.2 (44.3-50.0)                 | 57.0 <sup>4</sup>     | + 9.8%                  |
| North        | Rondônia            | 54.0 (41.5-66.1)                 | 41.0 <sup>5</sup>     | - 13.0.                 |
|              | Acre                | 75.4 (58.4-87.0)                 | 41.0 <sup>6</sup>     | - 34.4                  |
|              | Amazonas            | 42.0 (26.3-59.6)                 | 47.0 <sup>7</sup>     | + 5.0                   |
|              | Roraima             | 7.5 (2.8-18.3)                   | n.a.                  | n.a.                    |
|              | Pará                | 35.1 (24.6-47.3)                 | 41.0 <sup>8</sup>     | + 5.9                   |
|              | Amapá               | 29.5 (13.4-53.1)                 | 47.0 <sup>3,9</sup>   | + 17.5                  |
|              | Tocantins           | 43.6 (20.5-69.8)                 | n.a.                  | n.a.                    |
| Northeast    | Maranhão            | 63.0 (52.3-72.6)                 | 73.0 <sup>10</sup>    | + 10.0                  |
|              | Piauí               | 70.9 (58.3-80.9)                 | 76.0 <sup>3,11</sup>  | + 5.1                   |
|              | Ceará               | 56.3 (45.7-66.3)                 | 73.0 <sup>12</sup>    | + 16.7                  |
|              | Rio Grande do Norte | 60.2 (43.6-74.8)                 | 79.0 <sup>13</sup>    | + 18.8                  |
|              | Paraíba             | 40.4 (30.5-51.0)                 | 73.0 <sup>14</sup>    | + 32.6                  |
|              | Pernambuco          | 47.8 (37.4-58.5)                 | 57.0 <sup>15</sup>    | + 9.2                   |
|              | Alagoas             | 52.3 (40.0-64.3)                 | 73.0 <sup>16</sup>    | + 20.7                  |
|              | Sergipe             | 21.4 (12.0-35.1)                 | 73.0 <sup>17</sup>    | + 51.6                  |
| Bahia        | 51.7 (37.1-66.0)    | 40.0 <sup>18</sup>               | - 11.7                |                         |
| Southeast    | Minas Gerais        | 47.4 (39.0-56.0)                 | 60.0 <sup>19</sup>    | + 12.6                  |
|              | Espírito Santo      | 42.7 (32.0-54.2)                 | 66.0 <sup>20</sup>    | + 23.3                  |
|              | Rio de Janeiro      | 27.3 (21.8-33.5)                 | 41.0 <sup>21,22</sup> | + 13.7                  |
|              | São Paulo           | 52.2 (45.4-59.0)                 | 54.0 <sup>23</sup>    | + 1.8                   |
| South        | Paraná              | 62.8 (54.8-70.2)                 | 77.0 <sup>24</sup>    | + 14.2                  |
|              | Santa Catarina      | 34.4 (27.8-41.6)                 | 48.0 <sup>3,25</sup>  | + 13.6                  |
|              | Rio Grande do Sul   | 38.1 (31.8-44.8)                 | 49.0 <sup>26</sup>    | + 10.9                  |
| Central-West | Mato Grosso do Sul  | 77.2 (71.1-82.4)                 | 86.0 <sup>27</sup>    | + 8.8                   |
|              | Mato Grosso         | 61.3 (49.8-71.7)                 | 58.0 <sup>28</sup>    | - 3.3                   |
|              | Goiás               | 48.5 (37.1-60.0)                 | 63.0 <sup>29</sup>    | + 14.5                  |
|              | Distrito Federal    | 22.5 (13.0-35.9)                 | 21.0 <sup>30</sup>    | - 1.5                   |

<sup>1</sup> Based on brands approved on the Brazilian market by the ANVISA; <sup>2</sup> Legal brands authorised by the ANVISA but sold below 5.0 Brazilian Reals were also coded as illicit; <sup>3</sup> reference year 2018; n.a.=not available

## References (Supplemental Table 1):

<sup>4</sup> Instituto Brasileiro de Ética Concorrencial. Qual a reforma tributária o Brasil precisa? Revista ETCO 2019; 16(24). <https://www.etc.org.br/publicacoes/revista-etc/revista-etc-edicao-24/>.

<sup>5</sup> <https://g1.globo.com/ro/rondonia/noticia/2019/12/16/cigarros-clandestinos-devem-movimentar-r-22-milhoes-em-rondonia.ghtml>

<sup>6</sup> <https://contilnetnoticias.com.br/2019/12/contrabando-de-cigarros-deve-movimentar-r-8-milhoes-no-acre/>

<sup>7</sup> <https://www.acritica.com/manaus/amazonas-perde-r-20-milh-es-com-venda-ilegal-de-cigarros-aponta-lev-antamento-1.61987>

<sup>8</sup> <https://ver-o-fato.com.br/contrabando-de-cigarro-abala-s-aude-financieira-do-para/>

<sup>9</sup> <https://g1.globo.com/ap/amapa/noticia/2019/01/07/quase-metade-dos-cigarros-comercializados-no-ap-sao-contrabandeados-estima-ibope.ghtml>

<sup>10</sup> <https://oestadoma.com/noticias/2019/11/12/contrabando-de-cigarros-deve-movimentar-r-160-milhoes-no-maranhao/>

<sup>11</sup> <https://piauihoje.com/noticias/economia/governo-do-piaui-perde-r-57-milhoes-so-com-a-venda-ilegal-de-cigarros-75723.html>

- <sup>12</sup> <https://g1.globo.com/ce/ceara/noticia/2020/10/10/73percent-dos-cigarros-consumidos-no-ceara-sao-ilegais-apreensoes-dobram-em-2019.ghtml>
- <sup>13</sup> <http://www.tribunadonorte.com.br/noticia/cigarro-ilegal-atinge-79-do-mercado-poti-guar/499484#:~:text=O%20aumento%20da%20participa%C3%A7%C3%A3o%20dos,ritmo%20quase%20mensal%20de%20opera%C3%A7%C3%B5es.>
- <sup>14</sup> <https://www.reporterpb.com.br/noticia/paraiba/2019/11/05/contrabando-de-cigarros-deve-movimentar-r-214-milhoes-na-paraiba/96563.html>
- <sup>15</sup> <https://www.diariodepernambuco.com.br/noticia/economia/2019/12/mercado-ilegal-de-cigarros-movimenta-r-371-milhoes-em-pernambuco.html>
- <sup>16</sup> <https://tribunahoje.com/noticias/economia/2019/12/03/45962-contrabando-de-cigarros-deve-movimentar-r-154-milhoes-em-alagoas>
- <sup>17</sup> <https://g1.globo.com/se/sergipe/noticia/2019/11/12/contrabando-de-cigarros-rende-r-113-milhoes-em-sergipe-no-ano-de-2019-diz-instituto.ghtml>
- <sup>18</sup> <https://muitainformacao.com.br/post/1448-40--dos-cigarros-que-circulam-na-bahia-sao-contrabandeados>
- <sup>19</sup> <https://xpoents.com.br/de-cada-dez-cigarros-fumados-em-minas-gerais-seis-vem-do-contrabando/#:~:text=Em%202019%2C%20Estado%20perdeu%20R,por%20causa%20do%20mercado%20ilegal.&text=Mercado%20ilegal%20possibilitado%20por%20desequil%C3%ADbrio,1%2C2%20bilh%C3%A3o%20em%202019.>
- <sup>20</sup> <https://g1.globo.com/es/espírito-santo/noticia/2019/09/26/mais-de-60percent-do-cigarro-consumido-no-es-e-contrabandeado-aponta-pesquisa.ghtml>
- <sup>21</sup> <https://agenciabrasil.ebc.com.br/radioagencia-nacional/economia/audio/2019-10/encontro-nacional-no-rio-debate-estrategias-contr>
- <sup>22</sup> <https://g1.globo.com/rj/rio-de-janeiro/noticia/2021/08/10/cigarros-de-fabricantes-devedores-de-impostos-ampliam-mercado-no-rj-diz-pesquisa.ghtml>
- <sup>23</sup> <https://www.prnnews.com/news-releases/sao-paulo-movimenta-r-3-bilhoes-com-cigarros-ilegais-832956900.html>
- <sup>24</sup> <https://www.bemparana.com.br/noticia/uso-de-cigarro-ilegal-cai-no-parana-mas-ela-ainda-e-o-mais-consumido#.YrdTDXbMKUk>
- <sup>25</sup> <https://portaljoinville.com.br/conteudo/santa-catarina-perde-r-175-milhoes-com-contrabando-de-cigarros-e-mercado-ilegal-bate-recorde-no-brasil/>
- <sup>26</sup> <https://www.sinditabaco.com.br/item/no-rs-a-metade-do-cigarro-consumido-vem-do-contrabando/>
- <sup>27</sup> <https://www.agorams.com.br/mato-grosso-do-sul-lidera-mercado-ilegal-de-cigarros-no-brasil-em-2020/>
- <sup>28</sup> <https://www.diariodecuiaba.com.br/cidades/contrabando-de-cigarro-tem-queda-mas-causa-r-74-mi-de-prejuizo-em-mt/596705>
- <sup>29</sup> <https://www.podergoias.com.br/materia/6692/mesmo-com-alta-dos-precos-contrabando-ainda-domina-consumo-de-cigarros-em-goias>
- <sup>30</sup> [https://www.correiobraziliense.com.br/app/noticia/cidades/2019/10/30/interna\\_cidadesdf,802127/um-a-cada-cinco-cigarros-fumados-no-df-e-ilegal-mostra-pesquisa-do-ib.shtml](https://www.correiobraziliense.com.br/app/noticia/cidades/2019/10/30/interna_cidadesdf,802127/um-a-cada-cinco-cigarros-fumados-no-df-e-ilegal-mostra-pesquisa-do-ib.shtml)
